# Supplementary material
Source: ML conference proceedings conference paper supplement (https://openreview.net/forum?id=qKdg1fL7lc)
Supplement: supplementary_material [file attachment]

# SUPPLEMENTARY MATERIAL FOR PAPER: R-GENIE: REASONING-GUIDED GENERATIVE IMAGE EDITING

## Anonymous authors

Paper under double-blind review

To enhance the reproducibility and transparency of our work, we present additional dataset samples in Section A1. We also provide comprehensive visualizations of the ablation study results in Section A2, along with a comparative analysis against contemporary unified multimodal understanding and generation approaches in Section A3. After that, more experiments on runtime evaluation are provided in Section A4, meanwhile more convincing qualitative comparison results are illustrated in Section A5. Furthermore, we provide details about user study results in Section A6.

## A1 DATASET DETAILS

As detailed in Section 3.2, our dataset features curated instruction-image-edit triples for image editing tasks, where each sample incorporates natural language instructions requiring compositional reasoning, source and target image pairs. Here we present more triples examples of REditBench in Figure A1. Besides, the comparison with related datasets is presented in the Table A1. It is also worth mentioning that our dataset is released under the CC BY-NC 4.0 (research-only) with commercial use requiring authorization.

**Limitations in domain coverage.** While our approach generalizes well to in-distribution edits (*e.g.*, modifying common objects like “persons” or “dogs”), performance may degrade for highly specialized domains (*e.g.*, medical imaging or rare artistic styles) where training data is scarce. Future work could incorporate domain adaptation methods to mitigate this limitation.

**The potential bias.** Potential biases stem from template structure (prioritizing certain reasoning patterns) and annotator tendencies (*e.g.*, frequent attribute combinations like “red car”). We mitigated this via diverse annotators but acknowledge some cultural/linguistic biases may persist.

Table A1: Comparison of different datasets.

| Dataset                               | Controllable | Reasoning | Size    | Open Access |
|---------------------------------------|--------------|-----------|---------|-------------|
| InstructPix2Pix (Brooks et al., 2023) | ✓            | ✗         | 454,445 | ✓           |
| Reason50K (He et al., 2025)           | ✓            | ✓         | 51,039  | ✗           |
| ReasonPix2Pix (Jin et al., 2024)      | ✓            | ✓         | 40,212  | ✗           |
| MagicBrush (Zhang et al., 2023)       | ✓            | ✗         | 10,388  | ✓           |
| EditWorld (Yang et al., 2024)         | ✓            | ✗         | 10,000+ | ✓           |
| RISEBench (Zhao et al., 2025)         | ✓            | ✓         | 360     | ✓           |
| ReasonEdit (Huang et al., 2024)       | ✓            | ✓         | 219     | ✓           |
| REditBench (Ours)                     | ✓            | ✓         | 1,070   | ✓           |

## A2 VISUALIZATION OF ABLATION STUDY RESULTS

To rigorously evaluate the performance gains attributable to various components of our proposed paradigm, Figure A2 presents a comprehensive ablation study through comparative visual analysis. The systematic integration of individual architectural elements (from left to right) demonstrates statistically significant improvements in the model’s cross-modal reasoning capabilities. Quantitative metrics confirm that each progressive enhancement: (1) elevates semantic alignment accuracy between

054  
055  
056  
057  
058  
059  
060  
061  
062  
063  
064  
065  
066  
067  
068  
069  
070  
071  
072  
073  
074  
075  
076  
077  
078  
079  
080  
081  
082  
083  
084  
085  
086  
087  
088  
089  
090  
091  
092  
093  
094  
095  
096  
097  
098  
099  
100  
101  
102  
103  
104  
105  
106  
107

|                                                                                                                        |                                                                                      |
|------------------------------------------------------------------------------------------------------------------------|--------------------------------------------------------------------------------------|
|                                       |    |
| <p>"In the picture, which one is a input device for computer? Let it disappear."</p>                                   | <p>"Which is the guy's reflection? Turn his reflection into Taylor Swift."</p>       |
|                                      |   |
| <p>"There is a business meeting to be held. Whose outfit looks more formal? Exchange that person with Bill Gates."</p> | <p>"In this picture, who cannot slide on the ground? Turn him into a pole."</p>      |
|                                     |  |
| <p>"If you want to call someone, which one will you use? Take it away from the picture."</p>                           | <p>"Who is dribbling the ball in the game? Take him away from the picture."</p>      |
|                                     |  |
| <p>"What object help the man slide on the ground? Let the man wear a pair of roller skates."</p>                       | <p>"Who have the same exterior color as a panda? Turn them into giraffes."</p>       |

Figure A1: More Examples of the annotated image-instruction-edit triples.

108  
109  
110  
111  
112  
113  
114  
115  
116  
117  
118  
119  
120  
121  
122  
123  
124  
125  
126  
127  
128  
129  
130  
131  
132  
133  
134  
135  
136  
137  
138  
139  
140  
141  
142  
143  
144  
145  
146  
147  
148  
149  
150  
151  
152  
153  
154  
155  
156  
157  
158  
159  
160  
161

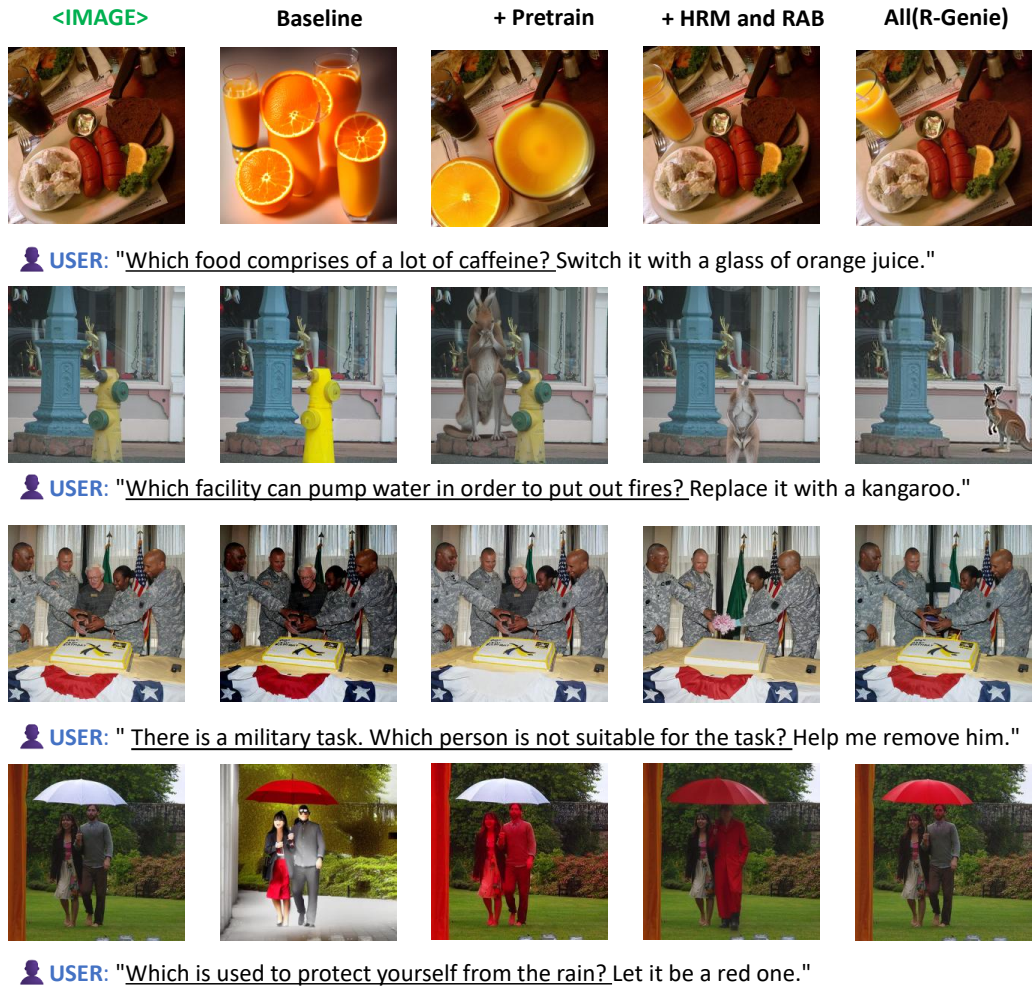

Figure A2: Visualization of Ablation Study Results.

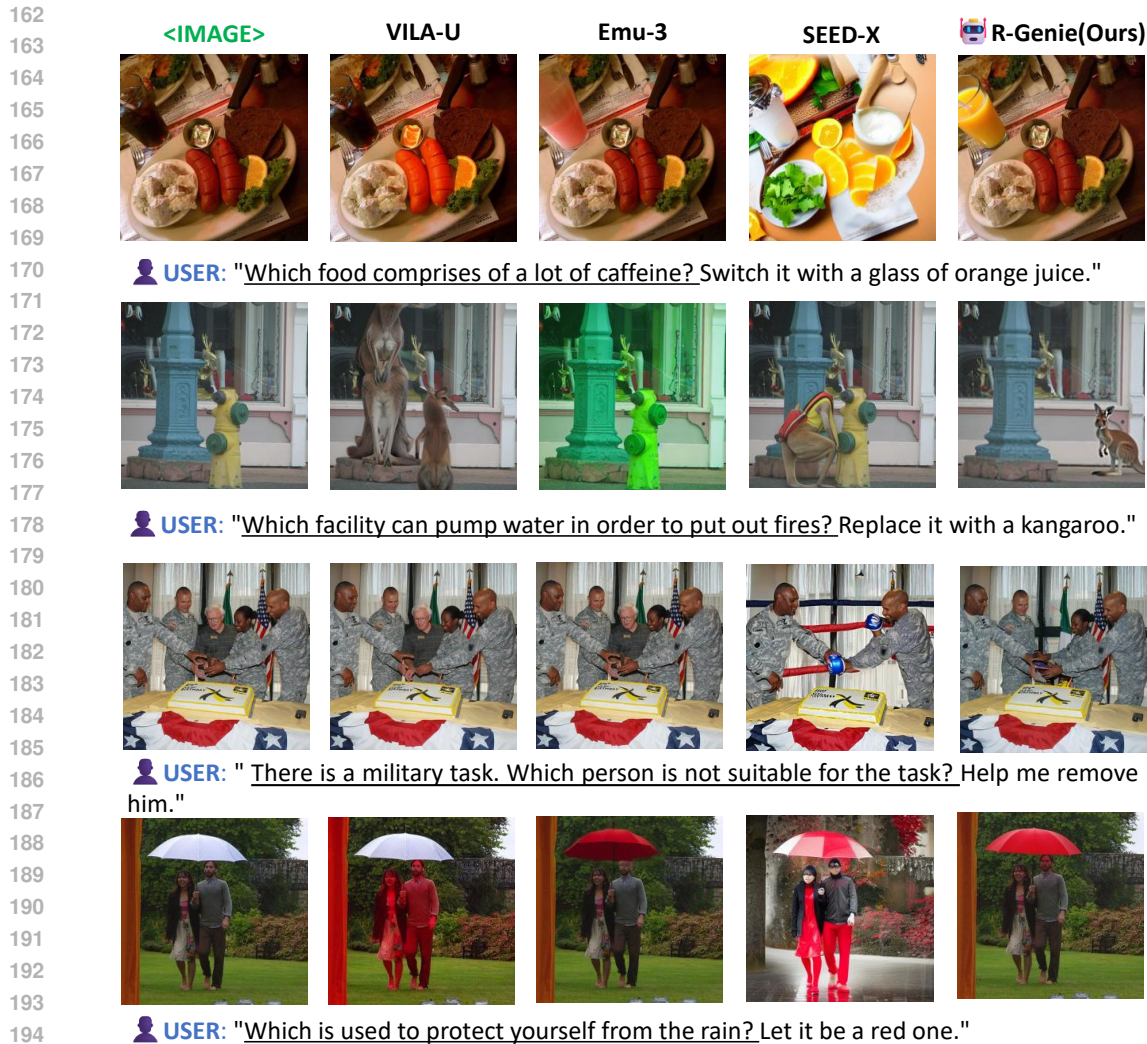

196 Figure A3: Qualitative comparison with unified multimodal understanding and generation methods.

197

198

199 input modalities, and (2) enhances perceptual coherence in synthetic outputs. These empirical results

200 validate our design choices while providing insights into the relative contributions of each module.

201

202

203 **A3 COMPARATIVE ANALYSIS WITH UNIFIED MULTIMODAL UNDERSTANDING**

204 **AND GENERATION METHODS**

205

206

207 To ensure comprehensive comparative analysis, we extend our evaluation to benchmark general

208 multimodal understanding and generation frameworks (Wu et al., 2024; Xiao et al., 2024; Wang et al.,

209 2024; Ge et al., 2024), despite their inherent limitations in being specifically optimized for instruction-

210 guided image editing tasks. As demonstrated in Figure A3, VILA-U (Wu et al., 2024) exhibits

211 fundamental deficiencies in target object recognition across most test samples, indicating critical

212 limitations in visual grounding capabilities. However, Emu-3 (Wang et al., 2024) produces outputs

213 with marginal modifications relative to source images, revealing constrained multimodal reasoning

214 and adaptive generation capacities. SEED-X has shown its identification capabilities in certain

215 scenarios and is still limited in background perseverance. These comparative observations collectively

illustrate the technical challenges in achieving robust integration of semantic understanding and

precise image manipulation within current multimodal frameworks.

Table A2: Comparison of different datasets.

| Methods                               | Runtime (generating one sample) | Param |
|---------------------------------------|---------------------------------|-------|
| InstructPix2Pix (Brooks et al., 2023) | 26.6s                           | 4.1B  |
| OmniGen (Xiao et al., 2024)           | 24.6s                           | 3.8B  |
| SmartEdit (Huang et al., 2024)        | 43.5s                           | 7.0B  |
| RGenie(Ours)                          | 14.7s                           | 1.3B  |

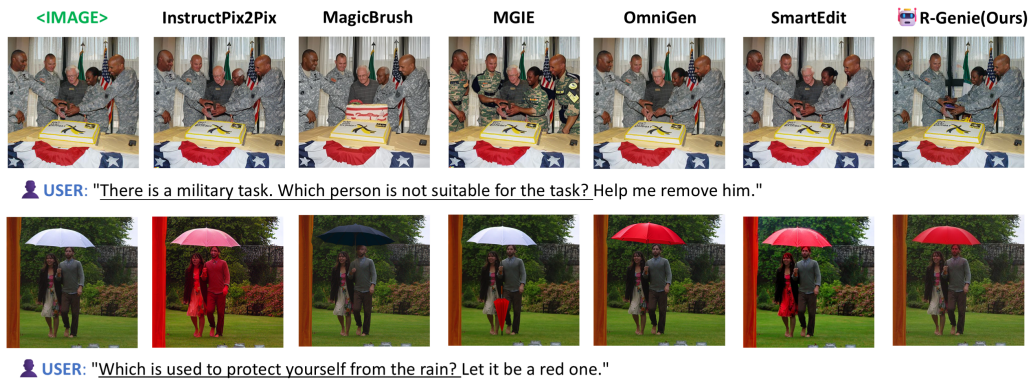

Figure A4: More visual comparison results.

## A4 MORE EXPERIMENTS

In this section, we compared the runtime required for the model to generate one sample. As shown in R-Table A2, our obtained results (evaluated by two NVIDIA GeForce RTX 3090 GPUs) reveal that R-Genie’s runtime is highly competitive: requiring only 14.7s per sample under the use of Phi-1.5 (Li et al., 2023). This is significantly faster than comparable methods like InstructPix2Pix (26.6s), OmniGen (24.6s), and SmartEdit (43.5s), while delivering substantial accuracy gains as demonstrated in Table 1 of the main paper.

## A5 MORE QUALITATIVE COMPARISON RESULTS

To present more convincing and comprehensive qualitative comparisons, here we provide more editing samples in Figure A4.

## A6 USER STUDY RESULTS

To evaluate the efficacy of our methodology, we conducted a comprehensive user study as detailed in the Experiment section. Each response alternative in the survey corresponds to one of the compared methods: Option A denotes outputs from InstructPix2Pix (Brooks et al., 2023), Option B represents results generated by MGIE (Fu et al., 2023), and Option C indicates outcomes from R-Genie. The aggregated results presented in Figures A5 to A10 demonstrate that R-Genie achieved statistically significant preference among participants. This empirical validation substantially supports our method’s superiority in human perceptual evaluation compared to existing baseline approaches.

## REFERENCES

Tim Brooks, Aleksander Holynski, and Alexei A Efros. Instructpix2pix: Learning to follow image editing instructions. In *Proceedings of the IEEE/CVF conference on computer vision and pattern recognition*, pp. 18392–18402, 2023. 1, 5

270  
271  
272  
273  
274  
275  
276  
277  
278  
279  
280  
281  
282  
283  
284  
285  
286  
287  
288  
289  
290  
291  
292  
293  
294  
295  
296  
297  
298  
299  
300  
301  
302  
303  
304  
305  
306  
307  
308  
309  
310  
311  
312  
313  
314  
315  
316  
317  
318  
319  
320  
321  
322  
323

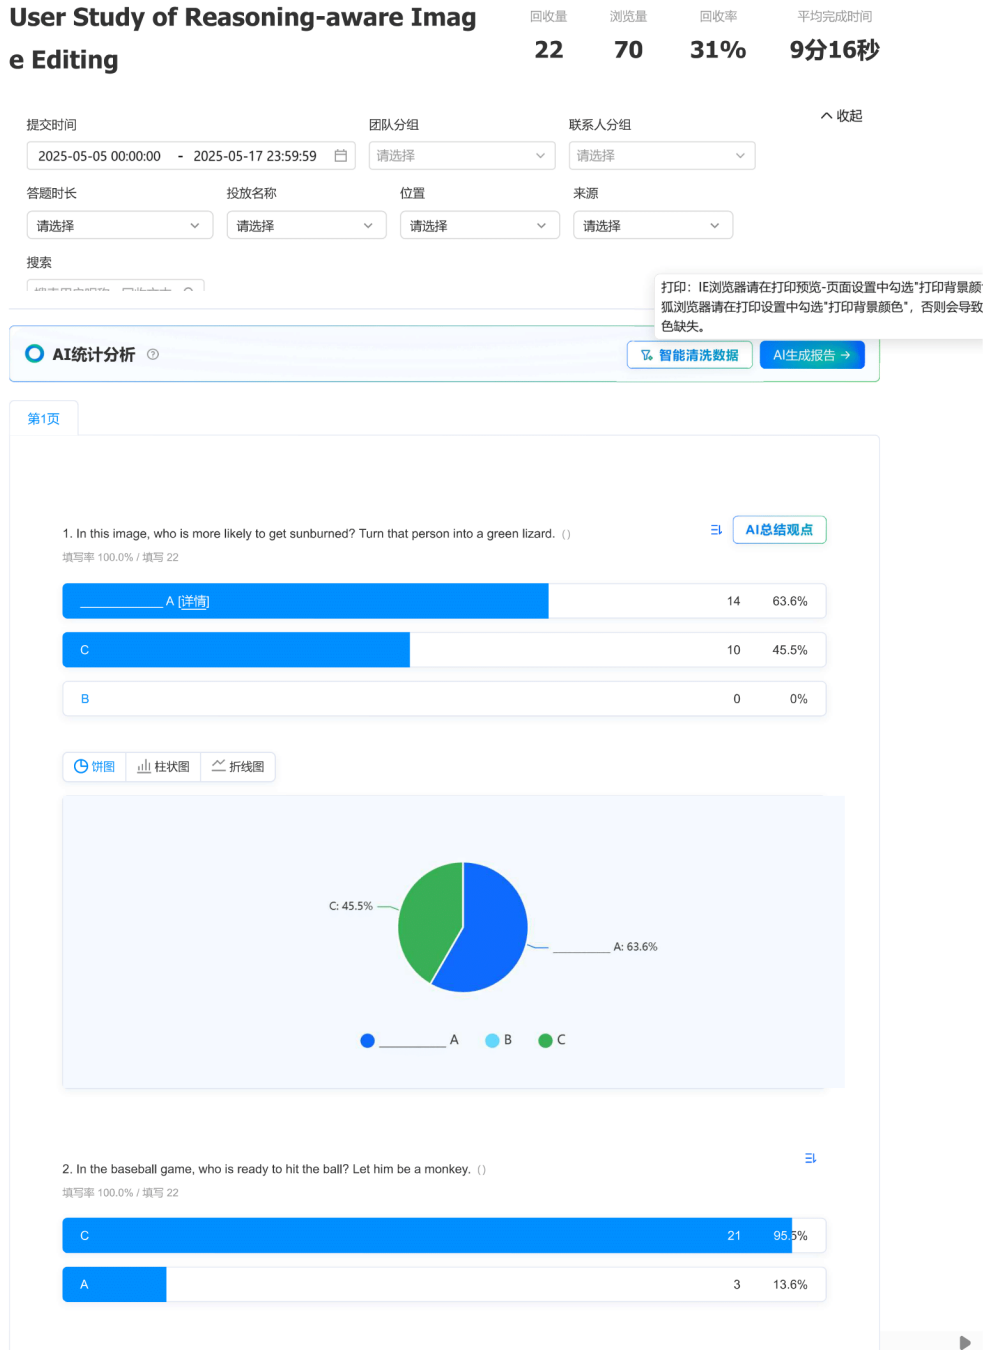

Figure A5: User Study Snapshot: Page 1

324  
325  
326  
327  
328  
329  
330  
331  
332  
333  
334  
335  
336  
337  
338  
339  
340  
341  
342  
343  
344  
345  
346  
347  
348  
349  
350  
351  
352  
353  
354  
355  
356  
357  
358  
359  
360  
361  
362  
363  
364  
365  
366  
367  
368  
369  
370  
371  
372  
373  
374  
375  
376  
377

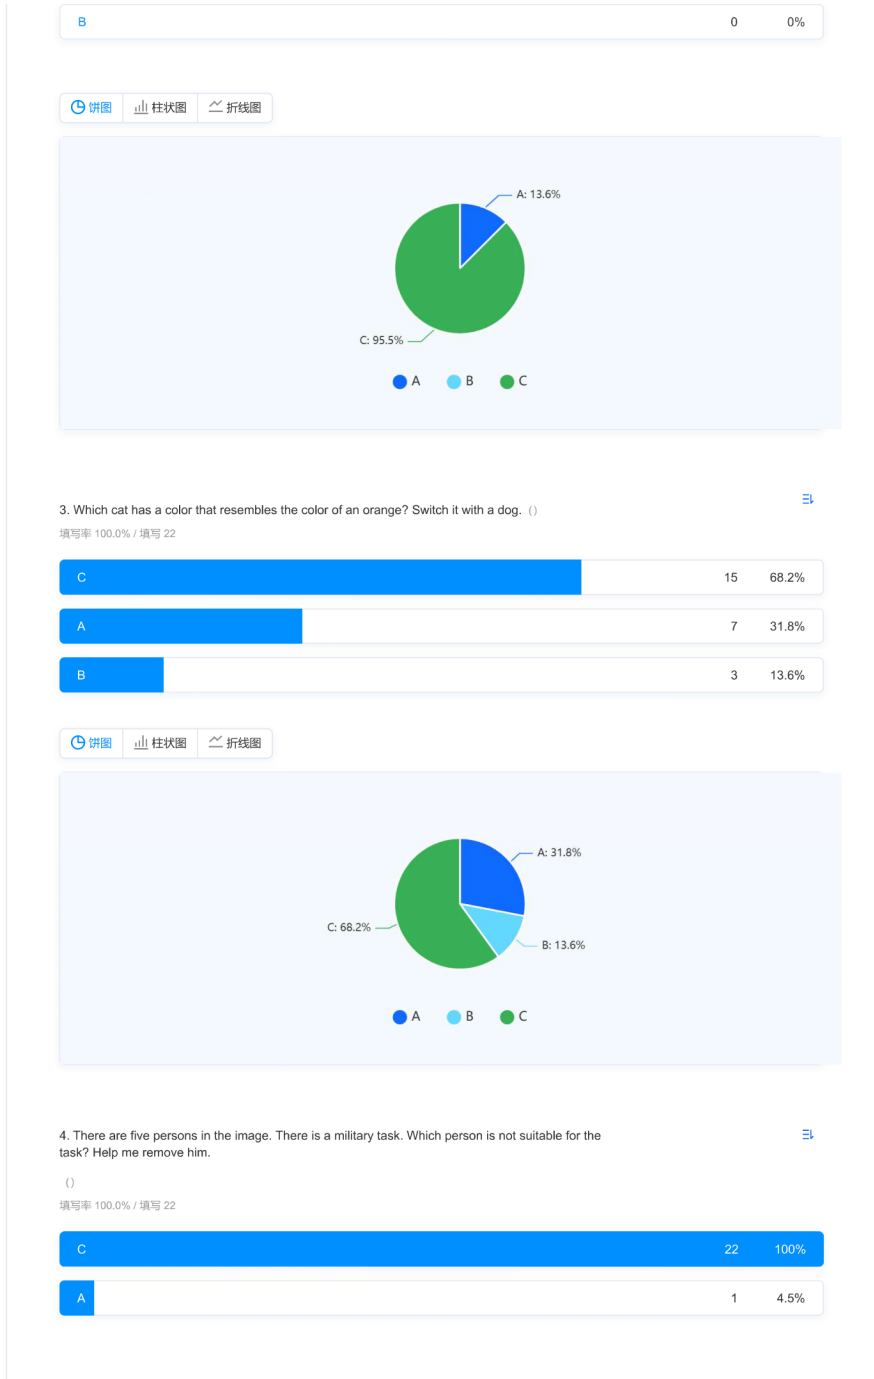

Figure A6: User Study Snapshot: Page 2

378  
379  
380  
381  
382  
383  
384  
385  
386  
387  
388  
389  
390  
391  
392  
393  
394  
395  
396  
397  
398  
399  
400  
401  
402  
403  
404  
405  
406  
407  
408  
409  
410  
411  
412  
413  
414  
415  
416  
417  
418  
419  
420  
421  
422  
423  
424  
425  
426  
427  
428  
429  
430  
431

B 0 0%

饼图 柱状图 折线图

| Category | Count | Percentage |
|----------|-------|------------|
| A        | 2     | 9.1%       |
| B        | 0     | 0%         |
| C        | 22    | 100%       |

5. Skiing is a dangerous sport. In the picture, someone is not suitable for this sport. Please delete that person. ()

填写率 100.0% / 填写 22

| Category | Count | Percentage |
|----------|-------|------------|
| C        | 22    | 100%       |
| A        | 2     | 9.1%       |
| B        | 0     | 0%         |

饼图 柱状图 折线图

| Category | Count | Percentage |
|----------|-------|------------|
| A        | 2     | 9.1%       |
| B        | 0     | 0%         |
| C        | 22    | 100%       |

6. In this picture, who has poor eyesight? Exchange him with a firefighter. ()

填写率 100.0% / 填写 22

| Category | Count | Percentage |
|----------|-------|------------|
| C        | 22    | 100%       |
| B        | 1     | 4.5%       |

Figure A7: User Study Snapshot: Page 3

432  
433  
434  
435  
436  
437  
438  
439  
440  
441  
442  
443  
444  
445  
446  
447  
448  
449  
450  
451  
452  
453  
454  
455  
456  
457  
458  
459  
460  
461  
462  
463  
464  
465  
466  
467  
468  
469  
470  
471  
472  
473  
474  
475  
476  
477  
478  
479  
480  
481  
482  
483  
484  
485

A 0 0%

饼图 柱状图 折线图

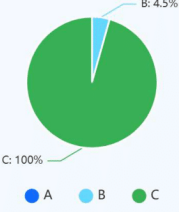

|   |      |       |
|---|------|-------|
| A | 0    | 0%    |
| B | 4.5  | 4.5%  |
| C | 95.5 | 95.5% |

7. Winter is coming, and animals need to rest. There is a sleepy bird in this picture. Help me exchange it with a frog. ( )

填写率 100.0% / 填写 22

|   |    |      |
|---|----|------|
| C | 22 | 100% |
| A | 0  | 0%   |
| B | 0  | 0%   |

饼图 柱状图 折线图



|   |     |      |
|---|-----|------|
| A | 0   | 0%   |
| B | 0   | 0%   |
| C | 100 | 100% |

8. Holiday is over. Someone needs to go to primary school. Let a dog replace that guy." ( )

填写率 100.0% / 填写 22

|   |    |      |
|---|----|------|
| C | 22 | 100% |
| A | 0  | 0%   |

Figure A8: User Study Snapshot: Page 4

486  
487  
488  
489  
490  
491  
492  
493  
494  
495  
496  
497  
498  
499  
500  
501  
502  
503  
504  
505  
506  
507  
508  
509  
510  
511  
512  
513  
514  
515  
516  
517  
518  
519  
520  
521  
522  
523  
524  
525  
526  
527  
528  
529  
530  
531  
532  
533  
534  
535  
536  
537  
538  
539

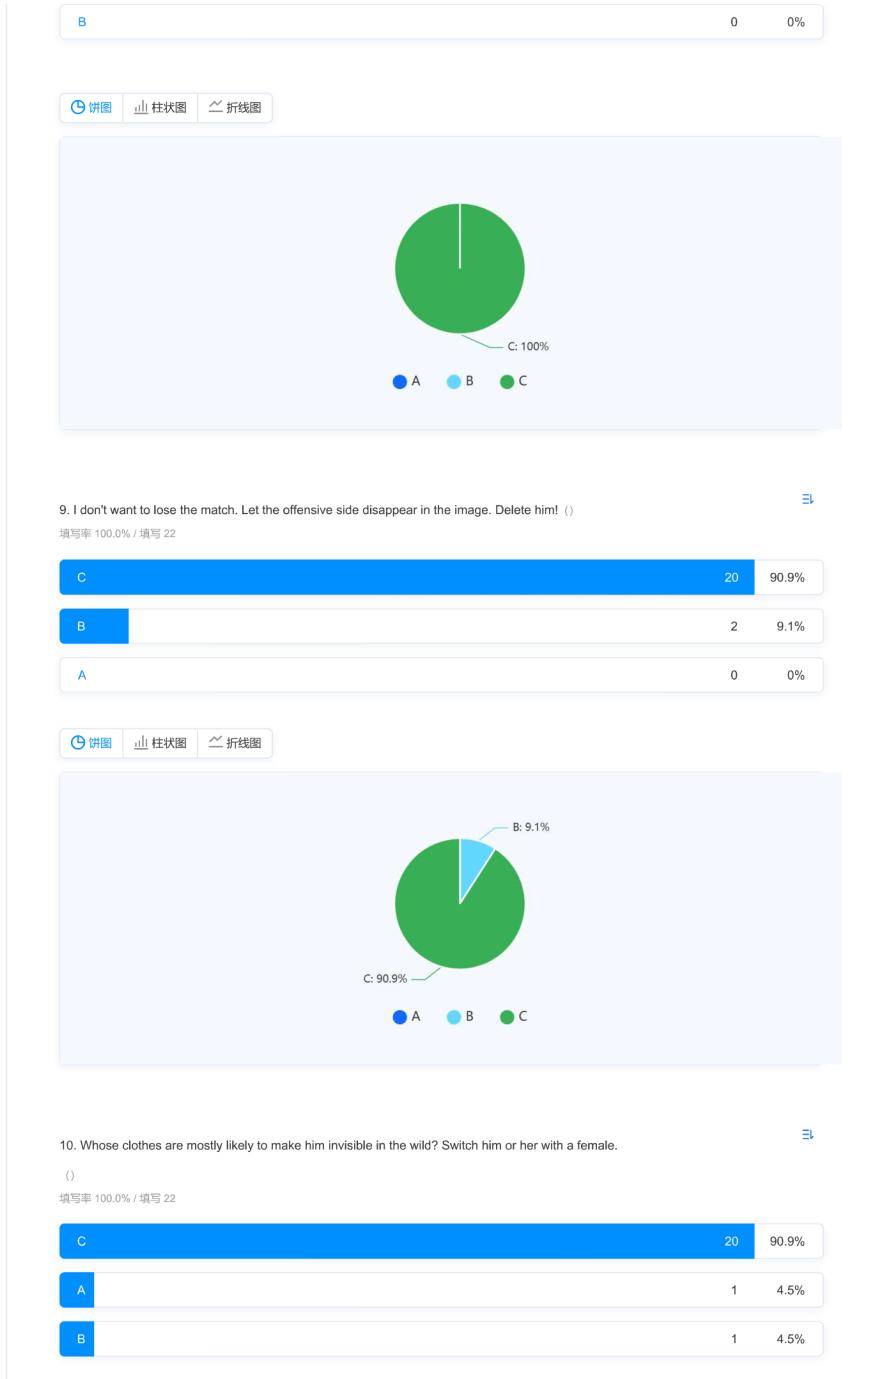

Figure A9: User Study Snapshot: Page 5

540  
541  
542  
543  
544  
545  
546  
547  
548  
549  
550  
551  
552  
553  
554  
555  
556  
557  
558  
559  
560  
561  
562  
563  
564  
565  
566  
567  
568  
569  
570  
571  
572  
573  
574  
575  
576  
577  
578  
579  
580  
581  
582  
583  
584  
585  
586  
587  
588  
589  
590  
591  
592  
593

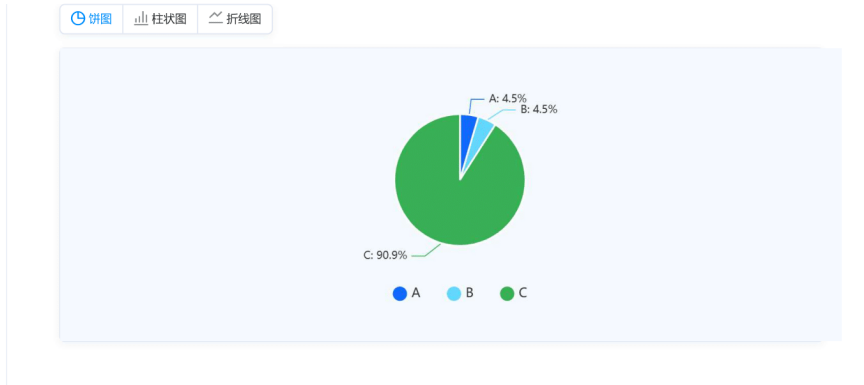

Figure A10: User Study Snapshot: Page 6

- Tsu-Jui Fu, Wenze Hu, Xianzhi Du, William Yang Wang, Yinfei Yang, and Zhe Gan. Guiding instruction-based image editing via multimodal large language models. *arXiv preprint arXiv:2309.17102*, 2023. 5
- Yuying Ge, Sijie Zhao, Jinguo Zhu, Yixiao Ge, Kun Yi, Lin Song, Chen Li, Xiaohan Ding, and Ying Shan. Seed-x: Multimodal models with unified multi-granularity comprehension and generation. *arXiv preprint arXiv:2404.14396*, 2024. 4
- Qingdong He, Xueqin Chen, Chaoyi Wang, Yanjie Pan, Xiaobin Hu, Zhenye Gan, Yabiao Wang, Chengjie Wang, Xiangtai Li, and Jiangning Zhang. Reasoning to edit: Hypothetical instruction-based image editing with visual reasoning. *arXiv*, 2025. 1
- Yuzhou Huang, Liangbin Xie, Xintao Wang, Ziyang Yuan, Xiaodong Cun, Yixiao Ge, Jiantao Zhou, Chao Dong, Rui Huang, Ruimao Zhang, et al. Smartedit: Exploring complex instruction-based image editing with multimodal large language models. In *Proceedings of the IEEE/CVF Conference on Computer Vision and Pattern Recognition*, pp. 8362–8371, 2024. 1, 5
- Ying Jin, Pengyang Ling, Xiaoyi Dong, Pan Zhang, Jiaqi Wang, and Dahua Lin. Reasonpix2pix: instruction reasoning dataset for advanced image editing. In *CVPRW*, 2024. 1
- Yuanzhi Li, Sébastien Bubeck, Ronen Eldan, Allie Del Giorno, Suriya Gunasekar, and Yin Tat Lee. Textbooks are all you need ii: phi-1.5 technical report. *arXiv preprint arXiv:2309.05463*, 2023. 5
- Xinlong Wang, Xiaosong Zhang, Zhengxiong Luo, Quan Sun, Yufeng Cui, Jinsheng Wang, Fan Zhang, Yueze Wang, Zhen Li, Qiyang Yu, et al. Emu3: Next-token prediction is all you need. *arXiv preprint arXiv:2409.18869*, 2024. 4
- Yecheng Wu, Zhuoyang Zhang, Junyu Chen, Haotian Tang, Dacheng Li, Yunhao Fang, Ligeng Zhu, Enze Xie, Hongxu Yin, Li Yi, et al. Vila-u: a unified foundation model integrating visual understanding and generation. *arXiv preprint arXiv:2409.04429*, 2024. 4
- Shitao Xiao, Yueze Wang, Junjie Zhou, Huaying Yuan, Xingrun Xing, Ruiran Yan, Chaofan Li, Shuting Wang, Tiejun Huang, and Zheng Liu. Omnigen: Unified image generation, 2024. URL <https://arxiv.org/abs/2409.11340>. 4, 5
- Ling Yang, Bohan Zeng, Jiaming Liu, Hong Li, Minghao Xu, Wentao Zhang, and Shuicheng Yan. Editworld: Simulating world dynamics for instruction-following image editing. *arXiv preprint arXiv:2405.14785*, 2024. 1
- Kai Zhang, Lingbo Mo, Wenhui Chen, Huan Sun, and Yu Su. Magicbrush: A manually annotated dataset for instruction-guided image editing. *Advances in Neural Information Processing Systems*, 36:31428–31449, 2023. 1

594 Xiangyu Zhao, Peiyuan Zhang, Kexian Tang, Hao Li, Zicheng Zhang, Guangtao Zhai, Junchi  
595 Yan, Hua Yang, Xue Yang, and Haodong Duan. Envisioning beyond the pixels: Benchmarking  
596 reasoning-informed visual editing. *arXiv preprint arXiv:2504.02826*, 2025. 1  
597  
598  
599  
600  
601  
602  
603  
604  
605  
606  
607  
608  
609  
610  
611  
612  
613  
614  
615  
616  
617  
618  
619  
620  
621  
622  
623  
624  
625  
626  
627  
628  
629  
630  
631  
632  
633  
634  
635  
636  
637  
638  
639  
640  
641  
642  
643  
644  
645  
646  
647
